# Supplementary material for: Detection of Biomolecules Using Solid-State Nanopores Fabricated by Controlled Dielectric Breakdown
Source: MDPI journal article supplement (doi:10.3390/s24082420), 2024-04-10
Supplement: s1 [file s1]

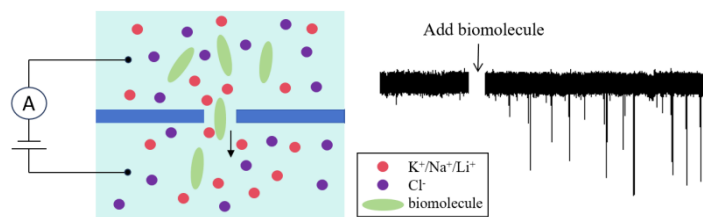

**Figure S1.** The principle of biomolecule detection by nanopores.

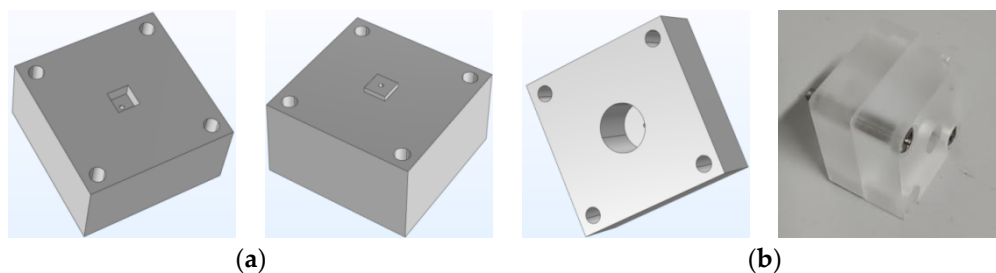

**Figure S2.** (a) The structure diagram of the flowcell (b) The flowcell used in the experiment.

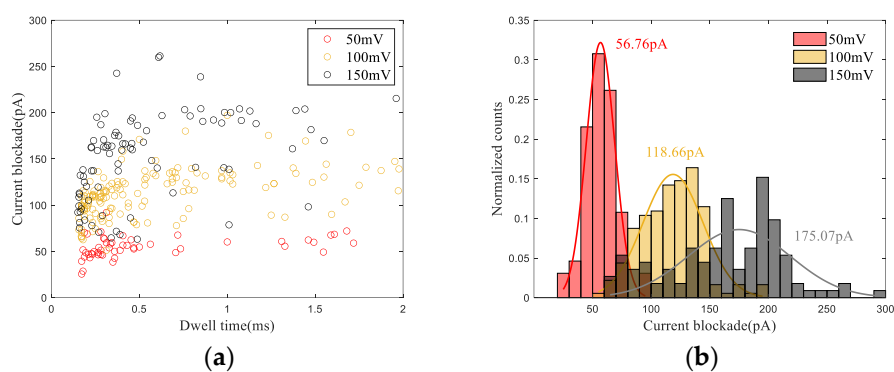

**Figure S3.** Statistics of DNA translocation at different voltage(50mV,100mV,150mV). (a) scatter diagram with current blockade and dwell time (b) histogram of current blockade.

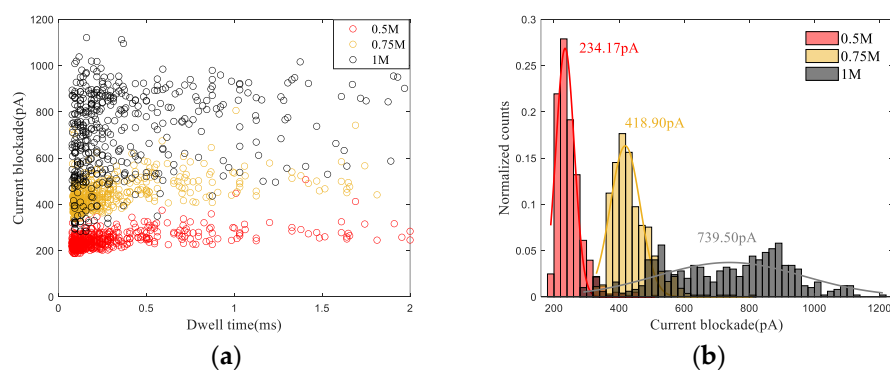

**Figure S4.** Statistic data of DNA translocation at different KCl concentration (0.5M,0.75M,1M). (a) scatter diagram with current blockade and dwell time (b) histogram of current blockade.
